# Supplementary material
Source: HighWire-hosted journal article supplement (https://gh.bmj.com/content/3/6/e001073)

## Supplementary file 2: Proportionate responses to the adapted WPDI, by Country

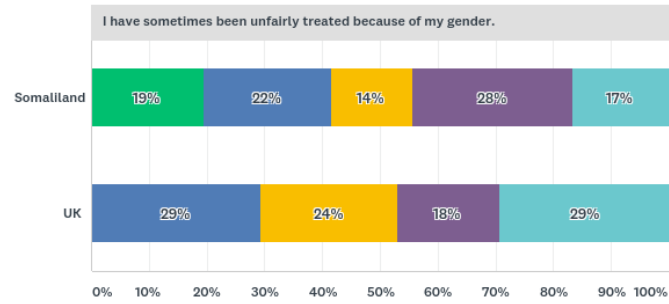

Strongly Agr Agree Neut Disagree StrnglyDsagr

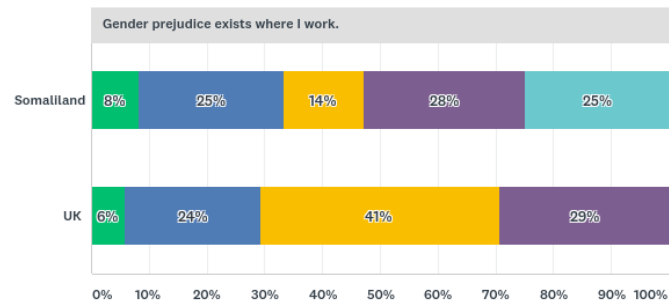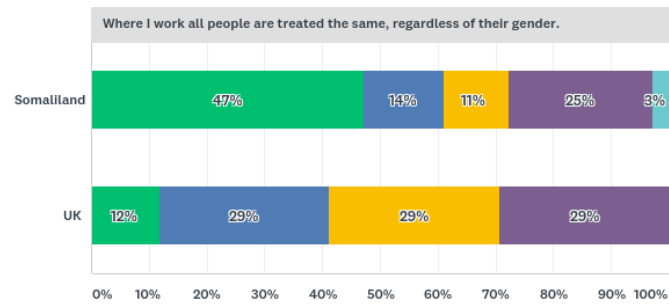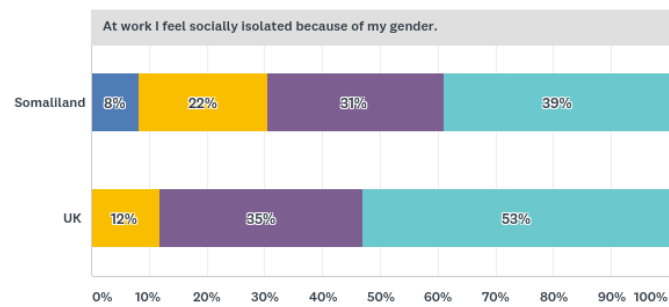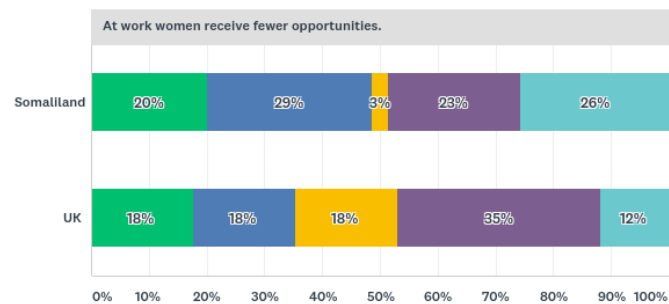

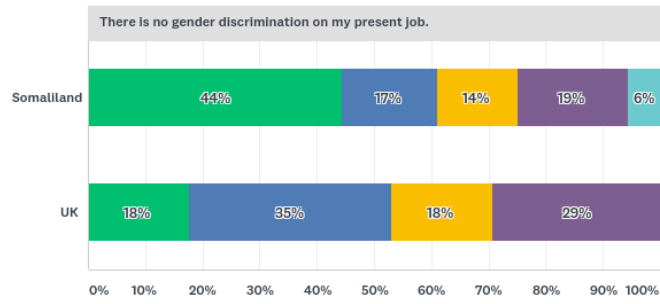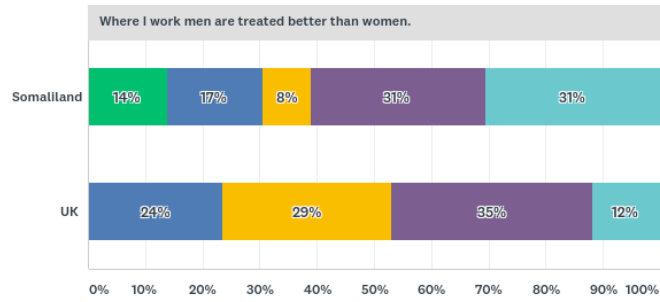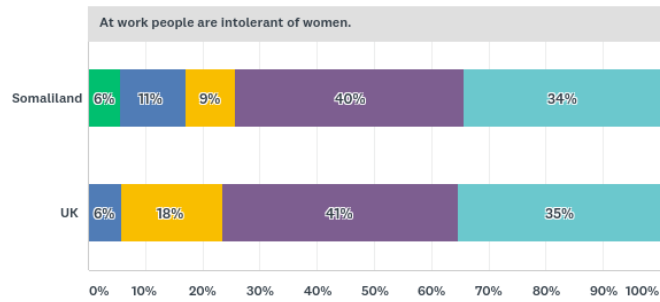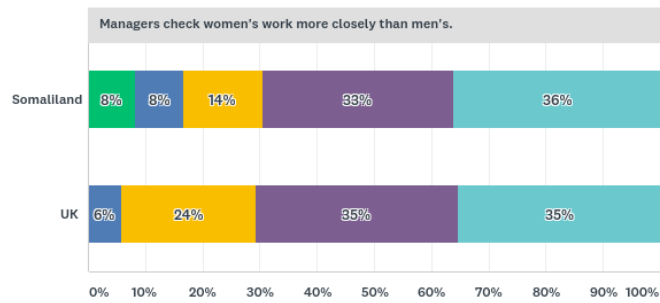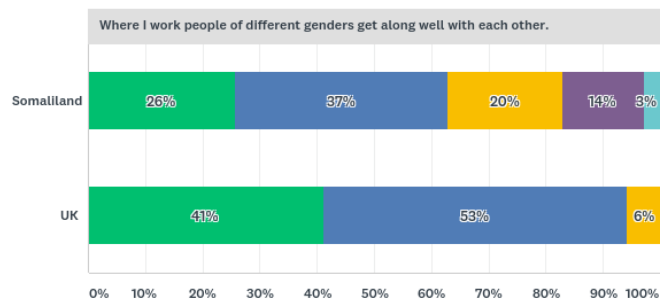

Supplement: inline-supplementary-material-2 [file inline-supplementary-material-2.pdf]
